# Supplementary material for: Context-Specific Requirement of Forty-Four Two-Component Loci in Pseudomonas aeruginosa Swarming
Source: PubMed Central journal article supplement — iScience. 2019 Mar 1;13:305–17. doi: 10.1016/j.isci.2019.02.028 (PMC6423354; doi:10.1016/j.isci.2019.02.028), 2019-03-01
Supplement: mmc1.pdf [file mmc1.pdf]

ISCI, Volume 13

## Supplemental Information

### Context-Specific Requirement of Forty-Four Two-Component Loci in *Pseudomonas aeruginosa* Swarming

Ameen M. Kollaran, Shubham Joge, Harshitha S. Kotian, Divakar Badal, Deep Prakash, Ayushi Mishra, Manoj Varma, and Varsha Singh

**Figure S1**

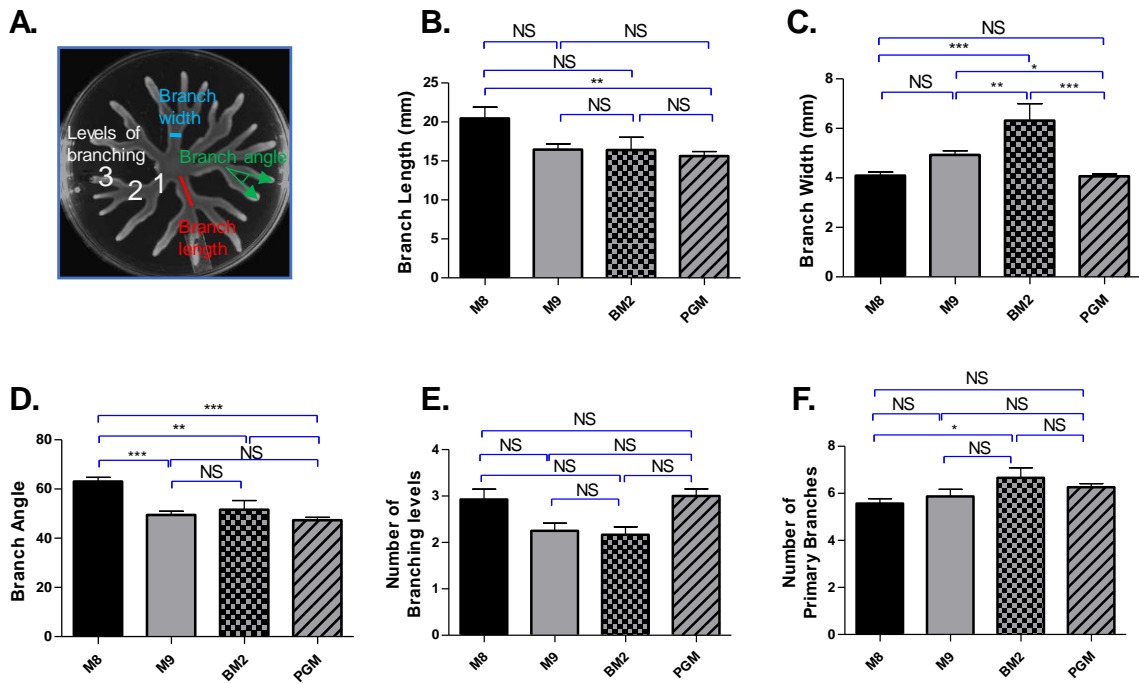

**Figure S1: Macroscale features of *P. aeruginosa* swarm, Related to Figure 1 and Figure 2.** (A) swarm features are indicated. Histograms for (B) branch or dendrite length, (C) branch width, (D) branch angle, (E) branching levels, and (F) number of primary branches. Pairwise comparison between every two media was performed by Tukey test. ( $P > 0.05$ , ns;  $P < 0.05$ , \*;  $p < 0.01$ , \*\*,  $P < 0.001$  \*\*\*).

**Figure S2**

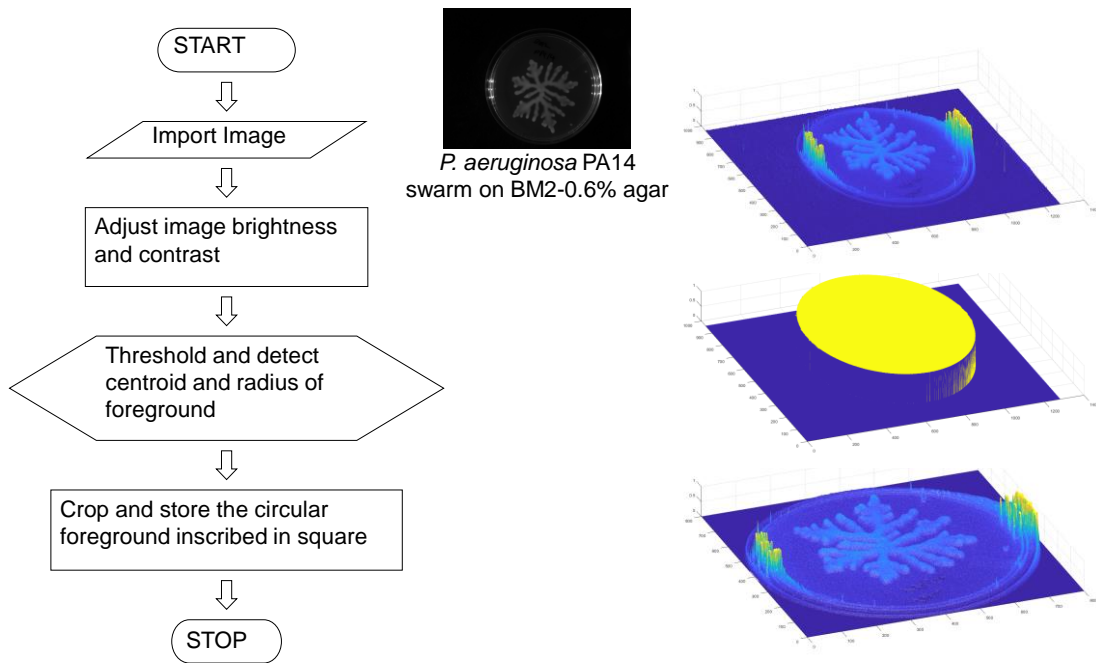

**Figure S2. MATLAB workflow for swarm image processing, Related to Figure 3 and Figure 4.**

Figure S3.

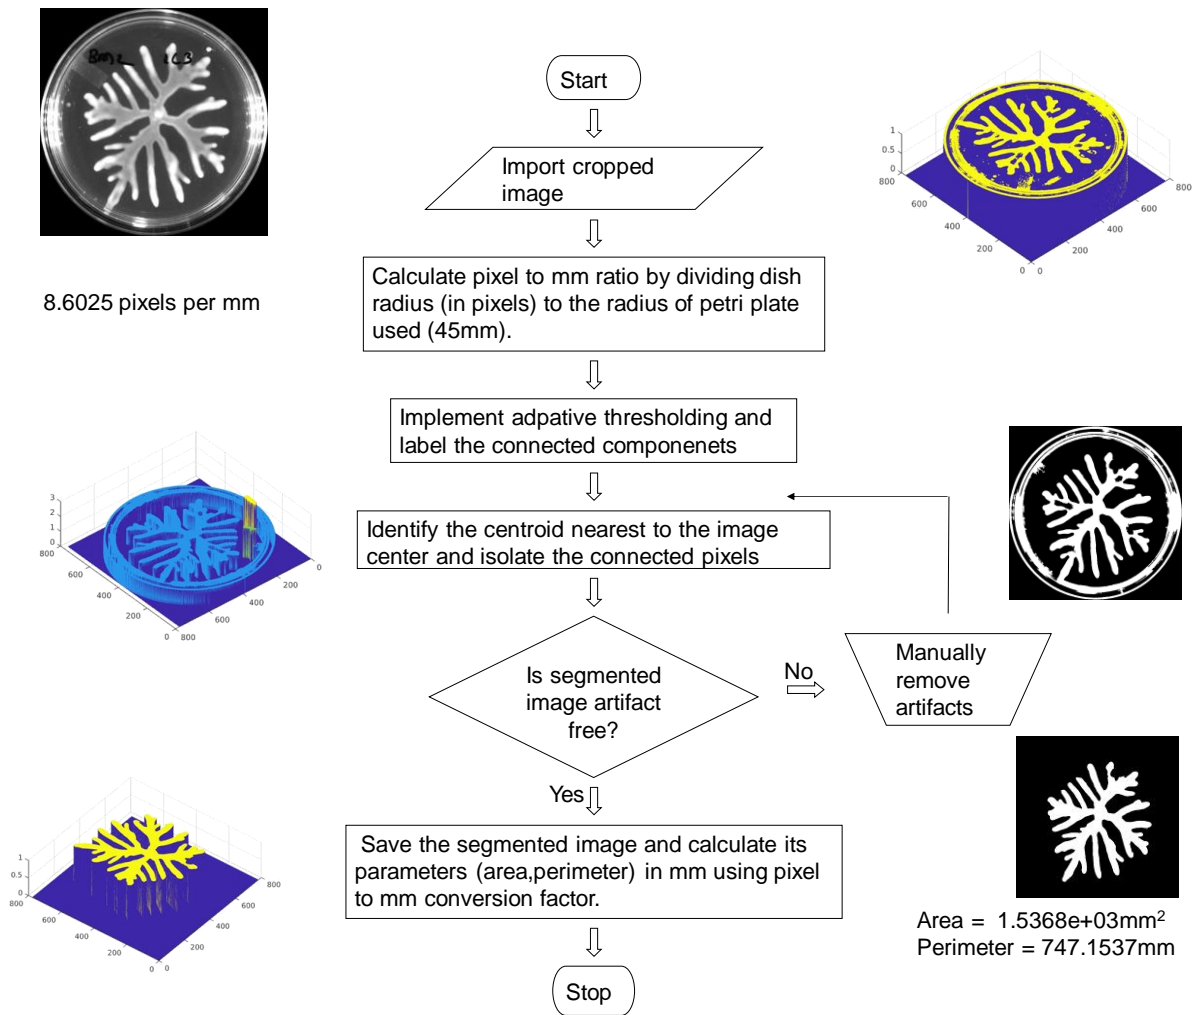

Figure S3. MATLAB workflow for feature extraction from processed swarm image, Related to Figure 3 and Figure 4.

**Figure S4. Swarming of 44 TCS mutant strains on six different growth media, Related to Figure 4 and Figure 5.**

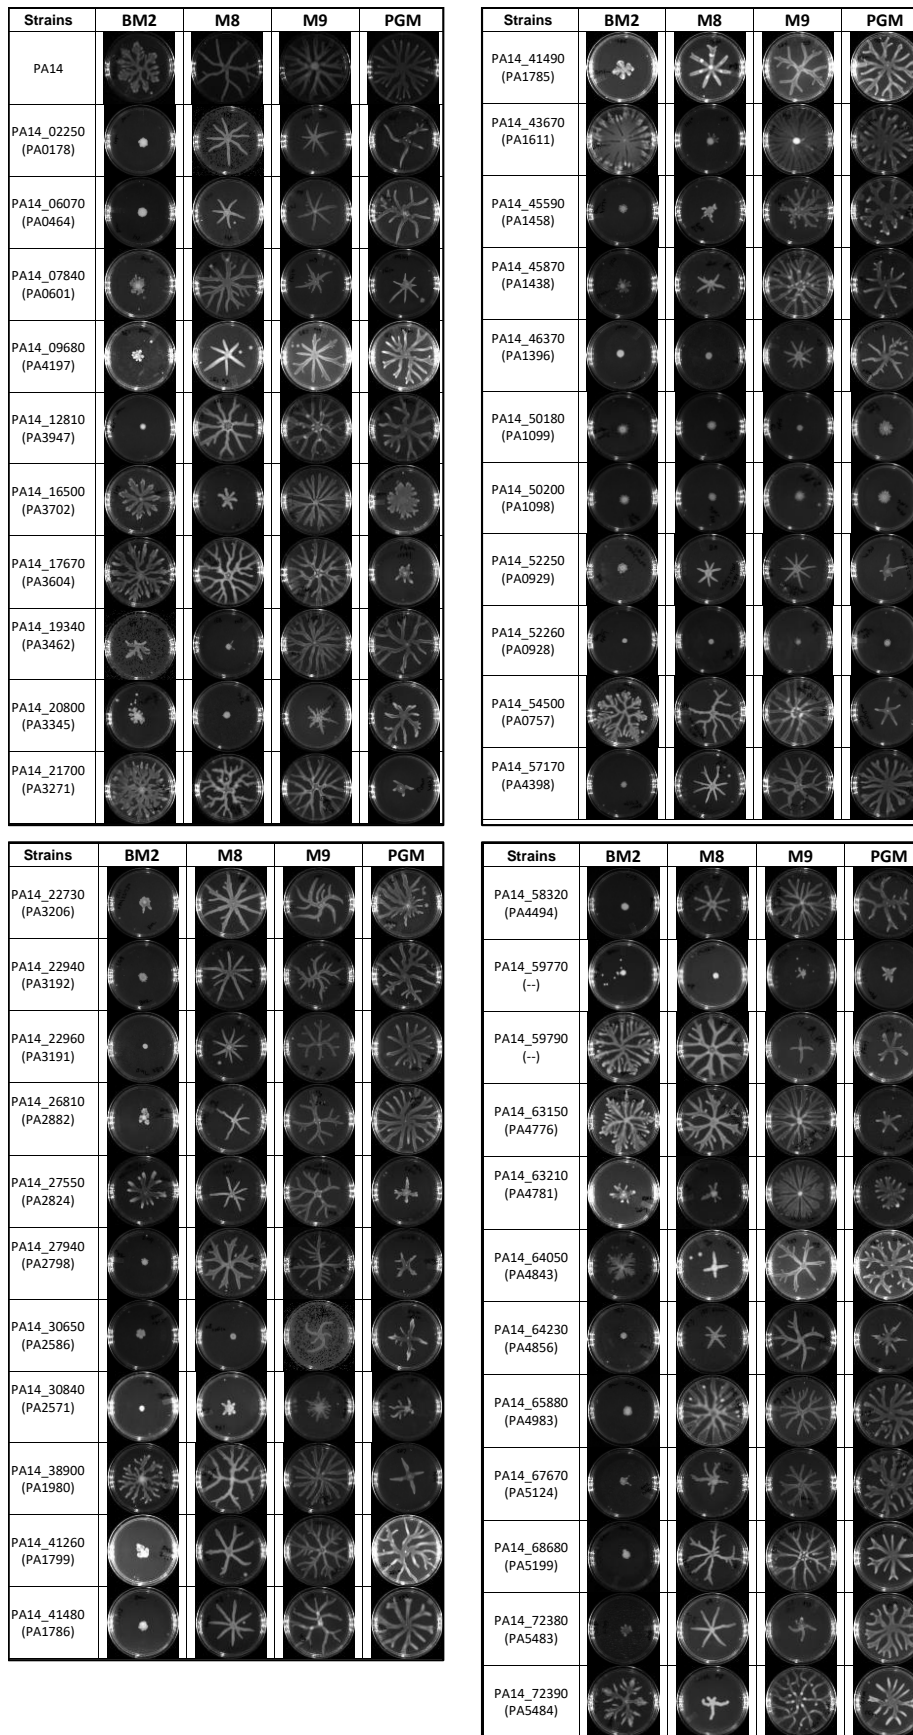

**Table S1. Perimeter values# for swarms of TCS mutants.**

| TCS SI No. | Locus ID    | MEDIA  |        |       |        | TCS SI No. | Locus ID   | MEDIA |     |     |     |
|------------|-------------|--------|--------|-------|--------|------------|------------|-------|-----|-----|-----|
|            |             | PGM    | M9     | M8    | BM2    |            |            | PGM   | M9  | M8  | BM2 |
|            | PA14        | 100±11 | 100±11 | 100±9 | 100±24 | 57         | PA14_43350 | 72    | 132 | 128 | 116 |
|            | <i>rhIR</i> | 3      | 3      | 4     | 4      | 58         | PA14_43670 | 104   | 161 | 11  | 174 |
| 1          | PA14_00430  | 42     | 118    | 110   | 113    | 59         | PA14_45590 | 71    | 67  | 15  | 8   |
| 2          | PA14_02250  | 30     | 32     | 67    | 6      | 60         | PA14_45870 | 52    | 140 | 24  | 16  |
| 3          | PA14_02260  | 69     | 86     | 66    | 68     | 61         | PA14_45880 | 78    | 195 | 121 | 159 |
| 4          | PA14_05320  | 119    | 95     | 42    | 116    | 62         | PA14_46370 | 51    | 30  | 4   | 5   |
| 5          | PA14_05330  | 61     | 193    | 97    | 30     | 63         | PA14_46980 | 97    | 113 | 27  | 36  |
| 6          | PA14_06060  | 103    | 37     | 45    | 168    | 64         | PA14_47390 | 108   | 54  | 29  | 58  |
| 7          | PA14_06070  | 56     | 32     | 32    | 6      | 65         | PA14_48160 | 142   | 111 | 83  | 167 |
| 8          | PA14_07820  | 93     | 76     | 111   | 88     | 66         | PA14_49170 | 53    | 46  | 50  | 97  |
| 9          | PA14_07840  | 23     | 25     | 136   | 18     | 67         | PA14_49180 | 25    | 185 | 32  | 37  |
| 10         | PA14_09680  | 84     | 56     | 40    | 9      | 68         | PA14_49420 | 45    | 111 | 110 | 44  |
| 11         | PA14_09690  | 90     | 137    | 31    | 67     | 69         | PA14_49440 | 121   | 155 | 70  | 157 |
| 12         | PA14_10770  | 48     | 72     | 38    | 99     | 70         | PA14_50180 | 9     | 3   | 8   | 13  |
| 13         | PA14_11120  | 127    | 122    | 106   | 196    | 71         | PA14_50200 | 7     | 7   | 6   | 10  |
| 14         | PA14_11630  | 83     | 107    | 68    | 148    | 72         | PA14_52240 | 88    | 49  | 99  | 126 |
| 15         | PA14_11680  | 81     | 44     | 22    | 44     | 73         | PA14_52250 | 15    | 33  | 27  | 7   |
| 16         | PA14_12780  | 106    | 62     | 31    | 60     | 74         | PA14_52260 | 4     | 3   | 3   | 3   |
| 17         | PA14_12810  | 99     | 118    | 122   | 4      | 75         | PA14_54500 | 18    | 120 | 85  | 177 |
| 18         | PA14_12820  | 71     | 128    | 103   | 21     | 76         | PA14_54510 | 108   | 49  | 61  | 15  |
| 19         | PA14_13740  | 62     | 67     | 53    | 180    | 77         | PA14_55780 | 110   | 110 | 133 | 39  |
| 20         | PA14_16350  | 61     | 117    | 34    | 112    | 78         | PA14_55810 | 88    | 159 | 159 | 111 |
| 21         | PA14_16500  | 31     | 133    | 20    | 83     | 79         | PA14_56950 | 88    | 90  | 140 | 40  |
| 22         | PA14_17670  | 12     | 109    | 150   | 176    | 80         | PA14_57140 | 94    | 126 | 157 | 152 |
| 23         | PA14_19340  | 80     | 138    | 7     | 29     | 81         | PA14_57170 | 93    | 77  | 50  | 5   |
| 24         | PA14_20780  | 92     | 78     | 135   | 125    | 82         | PA14_58300 | 106   | 106 | 61  | 155 |
| 25         | PA14_20800  | 43     | 27     | 5     | 17     | 83         | PA14_58320 | 59    | 97  | 50  | 5   |
| 26         | PA14_20820  | 83     | 21     | 30    | 41     | 84         | PA14_59770 | 10    | 7   | 4   | 4   |
| 27         | PA14_21700  | 10     | 108    | 137   | 147    | 85         | PA14_59780 | 77    | 71  | 120 | 72  |
| 28         | PA14_22730  | 75     | 60     | 102   | 11     | 86         | PA14_59790 | 25    | 12  | 140 | 213 |
| 29         | PA14_22940  | 86     | 60     | 80    | 6      | 87         | PA14_59800 | 78    | 71  | 26  | 36  |
| 30         | PA14_22960  | 66     | 42     | 49    | 3      | 88         | PA14_60250 | 50    | 102 | 101 | 105 |
| 31         | PA14_24340  | 84     | 108    | 83    | 181    | 89         | PA14_60260 | 64    | 131 | 140 | 184 |
| 32         | PA14_24350  | 79     | 63     | 24    | 130    | 90         | PA14_62530 | 128   | 107 | 89  | 201 |
| 33         | PA14_24710  | 145    | 69     | 41    | 48     | 91         | PA14_62540 | 118   | 59  | 60  | 142 |
| 34         | PA14_24720  | 98     | 136    | 124   | 148    | 92         | PA14_63150 | 17    | 142 | 142 | 153 |
| 35         | PA14_26810  | 118    | 50     | 36    | 11     | 93         | PA14_63160 | 94    | 37  | 133 | 34  |
| 36         | PA14_27550  | 16     | 70     | 41    | 58     | 94         | PA14_63210 | 33    | 114 | 18  | 24  |
| 37         | PA14_27800  | 65     | 72     | 83    | 140    | 95         | PA14_64050 | 81    | 50  | 17  | 51  |
| 38         | PA14_27810  | 92     | 114    | 91    | 129    | 96         | PA14_64230 | 28    | 18  | 74  | 4   |
| 39         | PA14_27940  | 17     | 75     | 89    | 5      | 97         | PA14_65860 | 119   | 108 | 109 | 178 |
| 40         | PA14_29360  | 44     | 114    | 138   | 149    | 98         | PA14_65880 | 82    | 69  | 183 | 6   |
| 41         | PA14_29740  | 107    | 96     | 174   | 157    | 99         | PA14_67670 | 89    | 52  | 34  | 9   |
| 42         | PA14_30650  | 29     | 26     | 4     | 6      | 100        | PA14_67680 | 113   | 86  | 172 | 133 |
| 43         | PA14_30700  | 75     | 88     | 67    | 102    | 101        | PA14_68230 | 105   | 79  | 39  | 119 |
| 44         | PA14_30830  | 67     | 78     | 89    | 142    | 102        | PA14_68250 | 83    | 128 | 99  | 101 |
| 45         | PA14_30840  | 21     | 34     | 13    | 4      | 103        | PA14_68680 | 55    | 114 | 87  | 6   |
| 46         | PA14_31950  | 64     | 106    | 157   | 39     | 104        | PA14_69470 | 77    | 121 | 110 | 179 |
| 47         | PA14_31960  | 50     | 56     | 124   | 43     | 105        | PA14_69480 | 56    | 28  | 150 | 81  |
| 48         | PA14_32580  | 57     | 92     | 38    | 197    | 106        | PA14_70750 | 58    | 108 | 136 | 118 |
| 49         | PA14_36420  | 109    | 112    | 72    | 166    | 107        | PA14_70760 | 103   | 119 | 145 | 205 |
| 50         | PA14_37690  | 35     | 105    | 55    | 23     | 108        | PA14_70790 | 21    | 71  | 71  | 112 |
| 51         | PA14_38900  | 20     | 104    | 116   | 116    | 109        | PA14_72380 | 93    | 16  | 46  | 12  |
| 52         | PA14_40570  | 44     | 129    | 153   | 117    | 110        | PA14_72390 | 56    | 131 | 21  | 91  |
| 53         | PA14_41260  | 89     | 115    | 67    | 10     | 111        | PA14_72720 | 40    | 131 | 154 | 46  |
| 54         | PA14_41270  | 65     | 160    | 59    | 27     | 112        | PA14_72740 | 112   | 87  | 38  | 55  |
| 55         | PA14_41480  | 74     | 66     | 59    | 6      | 113        | PA14_73020 | 33    | 94  | 5   | 65  |
| 56         | PA14_41490  | 97     | 53     | 55    | 19     |            |            |       |     |     |     |

**Table S1. Perimeter values<sup>#</sup> for swarms of TCS mutants**, Related to Figure 4 and Figure 5.

<sup>#</sup>Deep blue (non-swarmer), perimeter < 20% of PA14 WT; light blue (weak swarmer), perimeter >20% to < mean - SD of PA14 WT; grey (wild type), mean  $\pm$  SD of PA14 WT; yellow (hyper-swarmer) > mean + SD of PA14 WT.

**Table S2. Description of TCS class of bacterial swarm regulators of *P. aeruginosa* PA14**

| Sl. No | PA14 ID                      | PAO1 ID | Gene name <sup>&amp;</sup> | Domain features <sup>*</sup> |
|--------|------------------------------|---------|----------------------------|------------------------------|
|        | <b>TCS pairs</b>             |         |                            |                              |
| 1      | PA14_22940                   | PA3192  | <i>gltR</i>                | REC-wHTH                     |
| 2      | PA14_22960                   | PA3191  | <i>gtrS</i>                | HAMP-HisK                    |
| 3      | PA14_41480                   | PA1786  | <i>nasS</i>                | (no hit found)               |
| 4      | PA14_41490                   | PA1785  | <i>nasT</i>                | REC-ANTAR                    |
| 5      | PA14_50180                   | PA1099  | <i>fleR</i>                | REC-AAA-Fis                  |
| 6      | PA14_50200                   | PA1098  | <i>fleS</i>                | PAS-HisK                     |
| 7      | PA14_72380                   | PA5483  | <i>algB</i>                | REC-AAA-Fis                  |
| 8      | PA14_72390                   | PA5484  | <i>kinB</i>                | HAMP-HisK                    |
|        | <b>TCS pairs<sup>#</sup></b> |         |                            |                              |
| 9      | PA14_02250                   | PA0178  | <i>cheA</i>                | HPt-HisK-cheW                |
| 10     | PA14_06070                   | PA0464  | <i>creC</i>                | HAMP-HisK                    |
| 11     | PA14_07840                   | PA0601  | <i>agtR</i>                | REC-HTH                      |
| 12     | PA14_09680                   | PA4197  | <i>bfiS</i>                | PAS-PAC-PAS-HisK             |
| 13     | PA14_12810                   | PA3947  | <i>rocR</i>                | REC-EAL                      |
| 14     | PA14_16500                   | PA3702  | <i>wspR</i>                | REC-GGDEF                    |
| 15     | PA14_22730                   | PA3206  | <i>cpxA</i>                | HAMP-HisK                    |
| 16     | PA14_26810                   | PA2882  |                            | CBS-HisK                     |
| 17     | PA14_30840                   | PA2571  |                            | HisK                         |
| 18     | PA14_38900                   | PA1980  | <i>eraR</i>                | REC-HTH                      |
| 19     | PA14_41260                   | PA1799  | <i>parR</i>                | REC-wHTH                     |
| 20     | PA14_45590                   | PA1458  |                            | Hpt-HisK-CheW                |
| 21     | PA14_45870                   | PA1438  |                            | HAMP-HisK                    |
| 22     | PA14_52250                   | PA0929  | <i>pirR</i>                | REC-wHTH                     |
| 23     | PA14_54500                   | PA0757  | <i>tctE</i>                | HAMP-HisK                    |
| 24     | PA14_57170                   | PA4398  |                            | HAMP-PAS-HisK                |
| 25     | PA14_58320                   | PA4494  | <i>RoxS</i>                | HisK                         |
| 26     | PA14_63150                   | PA4776  | <i>pmrA</i>                | REC-wHTH                     |
| 27     | PA14_65880                   | PA4983  | <i>aruR</i>                | REC-wHTH                     |
| 28     | PA14_67670                   | PA5124  | <i>ntrB</i>                | HisK                         |
| 29     | PA14_68680                   | PA5199  | <i>envZ/amgS</i>           | HAMP-HisK                    |
| 30     | PA14_59770                   | N/A     | <i>rcsB</i>                | REC-HTH                      |
| 31     | PA14_59790                   | N/A     | <i>pvrR</i>                | REC-EAL                      |
|        | <b>Hybrids</b>               |         |                            |                              |
| 32     | PA14_19340                   | PA3462  |                            | HisK-REC                     |
| 33     | PA14_21700                   | PA3271  |                            | Na:Solute_symport-HisK-REC   |
| 34     | PA14_27550                   | PA2824  | <i>sagS</i>                | HisK-REC                     |
| 35     | PA14_43670                   | PA1611  |                            | HAMP-HisK-REC                |
| 36     | PA14_46370                   | PA1396  |                            | HisK-REC                     |
| 37     | PA14_52260                   | PA0928  | <i>GacS</i>                | HAMP-HisK-REC-HPt            |
| 38     | PA14_64230                   | PA4856  | <i>RetS</i>                | HisK-REC-REC                 |
|        | <b>Orphans</b>               |         |                            |                              |
| 39     | PA14_17670                   | PA3604  | <i>erdR</i>                | REC-HTH                      |
| 40     | PA14_27940                   | PA2798  |                            | REC                          |
| 41     | PA14_63210                   | PA4781  |                            | REC-HD-GYP                   |
| 42     | PA14_64050                   | PA4843  | <i>gcbA</i>                | REC-REC-GGDEF                |
| 43     | PA14_30650                   | PA2586  | <i>gacA</i>                | REC-HTH                      |
|        | <b>HPt Protein</b>           |         |                            |                              |
| 44     | PA14_20800                   | PA3345  | <i>hptB</i>                | HPt                          |



**Table S2. Description of TCS class of bacterial swarm regulators of *P. aeruginosa* PA14, Related to Figure 5.** \* Domain descriptions are based on prosite (<https://prosite.expasy.org/scanprosite/>) protein domain searches. # TCS genes with known interacting partner. However, the partner did not enrich in this screen. & Those in bold letters are newly proposed *bsw* names, based on this study. Sensor kinases are shown in grey. All others are response regulators or histidine phosphor transfer protein.

**Table S3. Crystal Violet based quantification<sup>#</sup> of biofilm formation in *P. aeruginosa* PA14.**

| Strain     | PA01 ID     |      | PGM             | M9              | M8              | BM2             | M63             |
|------------|-------------|------|-----------------|-----------------|-----------------|-----------------|-----------------|
| PA14       |             |      | 1.0 ± 0.0, n=45 | 1.0 ± 0.1, n=41 |
| pelA       | PA3064      |      | 0.3 ± 0.0, n=40 | 0.4 ± 0.0, n=41 | 0.2 ± 0.0, n=42 | 0.4 ± 0.0, n=39 | 0.4 ± 0.0, n=36 |
| PA14_02250 | PA0178      | cheA | 3.0 ± 0.4, n=9  | 1.7 ± 0.1, n=9  | 2.2 ± 0.2, n=9  | 2.2 ± 0.2, n=9  | 2.1 ± 0.2, n=9  |
| PA14_06070 | PA0464      | creC | 4.6 ± 0.8, n=9  | 2.5 ± 0.3, n=9  | 3.0 ± 0.6, n=9  | 4.6 ± 0.6, n=9  | 3.0 ± 0.3, n=9  |
| PA14_07840 | PA0601      |      | 1.0 ± 0.2, n=9  | 2.7 ± 0.3, n=12 | 2.9 ± 0.4, n=9  | 3.9 ± 0.5, n=6  | 2.2 ± 0.6, n=13 |
| PA14_12810 | PA3947      |      | 0.7 ± 0.1, n=6  | 1.2 ± 0.2, n=6  | 1.2 ± 0.2, n=3  | 2.8 ± 0.9, n=3  | 0.9 ± 0.1, n=6  |
| PA14_17670 | PA3604      |      | 0.6 ± 0.1, n=10 | 0.7 ± 0.1, n=8  | 1.8 ± 0.3, n=12 | 2.9 ± 0.4, n=15 | 2.2 ± 0.3, n=11 |
| PA14_19340 | PA3462      |      | 1.8 ± 0.2, n=15 | 2.0 ± 0.2, n=15 | 1.9 ± 0.2, n=15 | 2.4 ± 0.3, n=15 | 2.0 ± 0.2, n=15 |
| PA14_21700 | PA3271      |      | 2.0 ± 0.4, n=9  | 2.1 ± 0.3, n=9  | 1.5 ± 0.3, n=9  | 5.5 ± 0.8, n=9  | 2.4 ± 0.4, n=9  |
| PA14_22730 | PA3206      |      | 2.9 ± 0.2, n=15 | 2.3 ± 0.2, n=15 | 2.3 ± 0.2, n=15 | 3.2 ± 0.2, n=15 | 3.4 ± 0.5, n=14 |
| PA14_22940 | PA3192      | gtlR | 1.4 ± 0.1, n=9  | 2.0 ± 0.2, n=9  | 1.2 ± 0.2, n=9  | 3.5 ± 0.8, n=9  | 2.2 ± 0.2, n=9  |
| PA14_22960 | PA3191      |      | 2.5 ± 0.2, n=18 | 2.3 ± 0.2, n=18 | 2.0 ± 0.2, n=18 | 4.2 ± 0.8, n=12 | 2.1 ± 0.2, n=16 |
| PA14_26810 | PA2882      |      | 1.7 ± 0.3, n=9  | 1.3 ± 0.1, n=9  | 1.7 ± 0.2, n=9  | 1.0 ± 0.1, n=9  | 1.8 ± 0.1, n=9  |
| PA14_27550 | PA2824      |      | 1.1 ± 0.1, n=15 | 1.1 ± 0.2, n=15 | 1.1 ± 0.1, n=15 | 1.4 ± 0.1, n=14 | 1.8 ± 0.4, n=15 |
| PA14_27940 | PA2798      |      | 2.8 ± 0.5, n=12 | 1.9 ± 0.1, n=12 | 1.1 ± 0.1, n=12 | 1.8 ± 0.2, n=12 | 2.9 ± 0.4, n=12 |
| PA14_30650 | PA2586      | gacA | 2.1 ± 0.3, n=9  | 1.9 ± 0.1, n=9  | 2.3 ± 0.2, n=12 | 1.4 ± 0.2, n=9  | 2.5 ± 0.2, n=9  |
| PA14_30840 | PA2571      |      | 1.4 ± 0.2, n=17 | 1.2 ± 0.2, n=18 | 1.8 ± 0.4, n=12 | 3.4 ± 0.3, n=18 | 1.6 ± 0.1, n=12 |
| PA14_41260 | PA1799      |      | 0.9 ± 0.1, n=9  | 0.9 ± 0.1, n=9  | 1.1 ± 0.2, n=9  | 0.2 ± 0.0, n=6  | 0.7 ± 0.2, n=9  |
| PA14_41480 | PA1786      | nasS | 0.8 ± 0.1, n=9  | 1.0 ± 0.2, n=9  | 0.8 ± 0.1, n=9  | 0.8 ± 0.1, n=7  | 0.8 ± 0.2, n=8  |
| PA14_45590 | PA1458      |      | 2.7 ± 0.4, n=9  | 1.8 ± 0.2, n=9  | 1.4 ± 0.4, n=9  | 1.0 ± 0.2, n=8  | 3.7 ± 0.7, n=8  |
| PA14_46370 | PA1396      |      | 1.9 ± 0.2, n=12 | 2.2 ± 0.2, n=12 | 1.7 ± 0.3, n=11 | 2.5 ± 0.5, n=12 | 2.1 ± 0.2, n=12 |
| PA14_50180 | PA1099      | fleR | 0.3 ± 0.0, n=9  | 0.2 ± 0.0, n=9  | 0.3 ± 0.1, n=9  | 0.5 ± 0.1, n=9  | 0.2 ± 0.0, n=3  |
| PA14_50200 | PA1098      | fleS | 0.2 ± 0.0, n=9  | 0.2 ± 0.0, n=9  | 0.4 ± 0.1, n=8  | 0.3 ± 0.0, n=9  | 0.2 ± 0.0, n=3  |
| PA14_52250 | PA0929      |      | 1.4 ± 0.2, n=9  | 1.6 ± 0.2, n=9  | 1.3 ± 0.2, n=9  | 2.5 ± 0.3, n=6  | 3.1 ± 0.6, n=9  |
| PA14_52260 | PA0928      | GacS | 1.6 ± 0.3, n=9  | 3.4 ± 0.2, n=9  | 1.9 ± 0.3, n=9  | 2.8 ± 0.6, n=5  | 1.0 ± 0.2, n=9  |
| PA14_54500 | PA0757      |      | 0.8 ± 0.1, n=9  | 1.3 ± 0.1, n=9  | 1.4 ± 0.0, n=6  | 2.8 ± 0.6, n=5  | 2.3 ± 0.3, n=9  |
| PA14_57170 | PA4398      |      | 1.6 ± 0.3, n=12 | 1.2 ± 0.3, n=12 | 2.0 ± 0.3, n=6  | 2.9 ± 0.3, n=6  | 1.6 ± 0.4, n=12 |
| PA14_58320 | PA4494      |      | 1.5 ± 0.2, n=15 | 1.7 ± 0.2, n=15 | 1.3 ± 0.1, n=15 | 1.8 ± 0.2, n=12 | 1.7 ± 0.3, n=15 |
| PA14_59770 | NOT PRESENT | rcsB | 1.9 ± 0.3, n=18 | 2.4 ± 0.4, n=18 | 2.5 ± 0.5, n=15 | 3.6 ± 0.5, n=12 | 2.5 ± 0.3, n=12 |
| PA14_63210 | PA4781      |      | 0.6 ± 0.1, n=9  | 0.8 ± 0.1, n=9  | 0.6 ± 0.1, n=9  | 1.0 ± 0.0, n=9  | 1.7 ± 0.2, n=9  |
| PA14_64230 | PA4856      |      | 3.4 ± 0.4, n=9  | 1.7 ± 0.1, n=9  | 2.5 ± 0.4, n=9  | 2.4 ± 0.1, n=9  | 3.3 ± 0.0, n=3  |
| PA14_65880 | PA4983      |      | 1.6 ± 0.3, n=12 | 1.8 ± 0.1, n=12 | 1.2 ± 0.2, n=12 | 1.4 ± 0.1, n=12 | 1.9 ± 0.2, n=12 |
| PA14_67670 | PA5124      | ntrB | 0.5 ± 0.0, n=15 | 1.5 ± 0.3, n=18 | 0.9 ± 0.2, n=18 | 1.4 ± 0.1, n=12 | 0.5 ± 0.1, n=15 |
| PA14_72380 | PA5483      | algB | 2.7 ± 1.2, n=9  | 1.3 ± 0.3, n=9  | 1.5 ± 0.3, n=8  | 1.3 ± 0.2, n=6  | 3.4 ± 1.1, n=9  |
| PA14_72390 | PA5484      |      | 1.0 ± 0.2, n=9  | 1.1 ± 0.1, n=9  | 1.1 ± 0.2, n=6  | 1.4 ± 0.3, n=6  | 0.5 ± 0.1, n=9  |

**Table S3. Crystal Violet based quantification<sup>#</sup> of biofilm formation in *P. aeruginosa* PA14, Related to Figure 5.**

<sup>#</sup> Grey cells represent values not significantly different from PA14 control ( $p > 0.05$ ); deep blue (defective), CV stain < 50% of PA14 control; light blue (weak CV stain), 50% to mean - SD of PA14 control; light yellow, CV stain up to 2-fold of PA14 control; deep yellow, CV stain 2 to 6-fold of PA14 control. Mean values of CV stain in each strain was compared with mean value of CV stain in PA14 control by unpaired *t* test. N represents number of replicates.

## TRANSPARENT METHODS

### Bacterial strains and growth conditions

*Pseudomonas aeruginosa* PA14 was used as the wild-type strain. All the mutant strains used in this work are from the transposon insertion mutant library of PA14 (Liberati et al., 2006). Unless otherwise mentioned, all strains were grown in Luria Bertani (LB) broth under standard laboratory conditions. For selection of transposon mutants, gentamycin ( $50 \mu\text{g mL}^{-1}$ ) antibiotic was used. No antibiotics were used in the swarm dishes. Additional growth media used in this study are BHI, BM2, M9, M8 (a modified M9 media without  $\text{NH}_4\text{Cl}$  and  $\text{CaCl}_2$ ), PGM and M63 medium ( $100 \mu\text{M KH}_2\text{PO}_4$ ,  $15.14 \text{ mM } (\text{NH}_4)_2\text{SO}_4$ ,  $0.36 \mu\text{M FeSO}_4\cdot\text{H}_2\text{O}$ ,  $1 \text{ mM MgSO}_4$  and 4% arginine). Media composition for the rest is provided in Table 1.

### Swarming assay and screening

Swarming motility assays were performed as previously described (Overhage et al., 2008; Yeung et al., 2009), with additional modifications. Appropriate medium (LB, BHI, M8, M9, BM2 or PGM) was solidified with 0.6% Bacto™ agar (BD) and inoculated after 16 hours. All plates were inoculated at the centre with  $2 \mu\text{L}$  of overnight bacterial culture in LB broth ( $\text{OD}_{600} = 2.8 - 3.0$ ) and incubated at  $37^\circ\text{C}$  for 24 hours. All the no-swearer phenotypes were confirmed at least in three independent experiments.

### Swimming Assay

For swimming tests, PGM containing 0.3% Bacto™ agar (BD) was used. A  $5 \mu\text{L}$  of 2 ml overnight culture was inoculated into 5 ml LB broth (secondary culture) and incubated at  $37^\circ\text{C}$  for 5 hours (or  $\text{OD}_{600} = 1$ ). Using sterile toothpicks, the secondary culture was introduced into the centre of swim agar plate by puncturing into the agar but without touching the base of the plates. Plates were incubated at  $37^\circ\text{C}$  for 24 hours right side up. Swimming proficiency were analysed by measuring the swim area covered.

### Biofilm quantification

Biofilm formations were assayed as previously described (O'Toole, 2011). Briefly, *P. aeruginosa* strains were grown overnight in 2 mL of LB broth at  $37^\circ\text{C}$ . Overnight culture was then diluted with biofilm media (M63) or swarming media (M9, M8, BM2 or PGM) at a ratio of 1:100.  $100 \mu\text{L}$  of the dilution were added to each well of a 96-well microtiter plate, in triplicate. Microtiter plate was then incubated at  $37^\circ\text{C}$  for 24 hours. After incubation, the plates were rinsed with tap water to remove the planktonic cells and air dried. 0.1% solution of crystal violet in water was added to each well of microtiter dish for staining, followed by 15 minutes incubation at room temperature. After rinsing the excess stain by vigorous shaking and tapping of the plate on paper towels, plates were dried for a few hours. Crystal violet stain in each well was solubilized in  $125 \mu\text{L}$  30% acetic acid followed by 15 minutes incubation at room temperature. Biofilm formation was quantified by measuring absorbance at 550 nm. PA14 WT was taken as reference; a mutant strain for EPS, *peIA*, was taken as control. The results are represented in table S3 as mean value (standard error of mean) and sample size (n). All strains were stained 3 - 4 independent times, with three replicates on every occasion.

## Principal component analysis for swarm features

Principal component analysis (PCA) was performed on different parameters of the colony pattern of wild type PA14 in different nutrient media. Based on the gross appearance of the patterns, we divided these patterns into two classes - branching and non-branching patterns. The wild type PA14 produces non-branching patterns on LB and BHI swarm agar but produces branching patterns on BM2, M8, M9 and PGM swarm agar. We defined the ten following parameters to describe a branching pattern of PA14 swarm:

Branch length (BL): Length of all dendrites in the pattern

Branch Angle (BA): Angle between two dendrites in the pattern

Branch width (BW): Dendrite width of all branches in the pattern

Area (A): Area covered by the swarm

Perimeter (P): Perimeter of the pattern formed by the swarm

Radius of Minimum bounding circle radius (RMBC): Radius of the circle that can encircle the pattern

Number of levels (NL): Number of levels of branching a dendrite undergoes

Normalised Area (NA): Ratio of Area of the pattern and Area of the minimum bounding circle

Number of primary branches (NPB): Number of branches originating from the point of inoculation

Growing tips (GT): Total number of dendrite tips present in the swarm at 24 hours.

The non-dendritic patterns (on LB and BHI agar) are characterized by Area (A), Perimeter (P), Radius of minimum bounding circle (RMBC), and the Normalized Area (NA). We chose two independent parameters to differentiate patterns of dendritic swarm. The parameters chosen i.e. Perimeter and Normalised area are also defined for patterns on LB and BHI.

**Statistical analysis:** One-way ANOVA was used to analyse variance of swarming traits across swarms on different media. For comparison of means of traits, post hoc Tukey test was performed in Figure 2. In all other cases, unpaired student's t test was performed to compare mean  $\pm$  SEM as indicated.

**Video S1.** Video of *P. aeruginosa* PA14 swarming along with trace for area, perimeter, and circularity on BHI-0.6% agar, Related to figure 2.

**Video S2.** Video of *P. aeruginosa* PA14 swarming along with trace for area, perimeter, and circularity on LB-0.6% agar, Related to figure 2.

**Video S3.** Video of *P. aeruginosa* PA14 swarming along with trace for area, perimeter, and circularity on M8-0.6% agar, Related to figure 2.

**Video S4.** Video of *P. aeruginosa* PA14 swarming along with trace for area, perimeter, and circularity on M9-0.6% agar, Related to figure 2.

**Video S5.** Video of *P. aeruginosa* PA14 swarming along with trace for area, perimeter, and circularity on BM2-0.6% agar, Related to figure 2.

**Video S6.** Video of *P. aeruginosa* PA14 swarming along with trace for area, perimeter, and circularity on PGM-0.6% agar, Related to figure 2.
